# Supplementary material for: Neisseria gonorrhoeae and extended-spectrum cephalosporins in California: surveillance and molecular detection of mosaic penA
Source: PubMed Central journal article supplement (PMC4235022; doi:10.1186/1471-2334-13-570), 2013-12-04
Supplement: 1471-2334-13-570-S1.pdf [file 1471-2334-13-570-S1.pdf]

*Screening forward primer*

*Modified forward primer*

800 810 820 830 840 850 860 870

Wildtype CGGTGGTGGT<sup>•</sup>TTTGGATGC<sup>•</sup>CCGCACGGGG<sup>•</sup>AAATCCTCGC<sup>•</sup>CTTGGCCAAT<sup>•</sup>ACGCCCGCT<sup>•</sup>ACGATCCCA<sup>•</sup>ACAGACCCGG<sup>•</sup>C<sup>•</sup>

XXXIV .....G.....T..T.....A...T.....T.....T..G.....A.....T.....

XXXVIII .....T.....T.....T.....T.....T.....T.....T.....T.....T.....

LA-A .....G.....G.....G.....G.....G.....G.....G.....G.....G.....

880 890 900 910 920 930 940 950

Wildtype CGGGCAGAC<sup>•</sup>AGCGAACAGC<sup>•</sup>GCGCAACCGT<sup>•</sup>GCCGTAACCG<sup>•</sup>ATATGATCG<sup>•</sup>AACCTGGTTC<sup>•</sup>GGAATCAA<sup>•</sup>ACC<sup>•</sup>GGTTCGTGAT<sup>•</sup>

XXXIV .A.....A...T...C.....C.....C.....T..C..G..G.....TACC..

XXXVIII .....T.....T.....T.....T.....T.....T.....T.....T.....T.....

LA-A .....T.....C.....C.....C.....C.....T..C..G..G.....TACC..

*RTPCR probe*

960 970 980 990 1000 1010 1020 1030

Wildtype TGCGAAGGC<sup>•</sup>ATTGGATGCG<sup>•</sup>GGCAAACCG<sup>•</sup>ATTTGAACGA<sup>•</sup>ACGGCTGAAT<sup>•</sup>ACGCAGCCTT<sup>•</sup>ATAAAATCGG<sup>•</sup>ACCGTCTCCC<sup>•</sup>G<sup>•</sup>

XXXIV ...C..A.....T.C.....GTG...GCA.C...TACAT.C.....C.T.....C.....TT..G..A...

XXXVIII ...C..A.....T.C.....GTG...GCA.C...TAC.T.C.....C.T.....C.....T...G..A...

LA-A ...C..A.....T.C.....GTG...GCA.C...TAC.T.C.....C.T.....C.....T...G..A...

*Screening reverse primer*

1040 1050 1060 1070 1080 1090 1100 1110

Wildtype TGCGCGATA<sup>•</sup>CCCATGTTTA<sup>•</sup>CCCTCTTTG<sup>•</sup>GATGTGCGCGG<sup>•</sup>CATTATGCA<sup>•</sup>GAAATCGTCCA<sup>•</sup>ACGTCCGCA<sup>•</sup>CAAGCAA<sup>•</sup>ACT<sup>•</sup>G<sup>•</sup>

XXXIV .A.AA.....C...T..TA.....A.....T.....T..C..T.....T

XXXVIII ..AA.....C...T..TA.....A.....T.....T..C..T.....T

LA-A ..AA.....C...T..TA.....A.....T.....T..C..T.....T

*Modified reverse primer*
